# Supplementary material
Source: PubMed Central journal article supplement (PMC7964621)
Supplement: 3101_materials.pdf [file 3101_materials.pdf]

| On-Line Table 1: SNR measurements (quantitative phantom) |                   |       |
|----------------------------------------------------------|-------------------|-------|
| Sequence                                                 | Acceleration      | SNR   |
| Sag T1WI                                                 | Original sequence | 68.2  |
|                                                          | 2 Averages        | 65.6  |
|                                                          | 1 Average         | 64.8  |
|                                                          | Acc 2             | 56.9  |
|                                                          | Acc 3             | 43.5  |
| Sag T2WI                                                 | Original sequence | 131.8 |
|                                                          | 1 Average         | 112.1 |
|                                                          | Acc 2             | 104   |
|                                                          | Acc 3             | 55.6  |
|                                                          | Acc 4             | 38.5  |
| Sag T2TIRM                                               | Original sequence | 157.5 |
|                                                          | Acc 2             | 78.9  |
|                                                          | Acc 3             | 38.4  |
|                                                          | Acc 4             | 24.4  |
|                                                          | Original sequence | 290.8 |
| Ax T2* GRE                                               | Acc 2             | 224.9 |
|                                                          | Acc 3             | 156.1 |
|                                                          | Acc 4             | 32.6  |

Note:—Acc indicates acceleration factor; Ax, axial; Sag, sagittal.

| Online Table 2: NU measurements (qualitative volunteers) |                   |       |                                                              |
|----------------------------------------------------------|-------------------|-------|--------------------------------------------------------------|
| Sequence                                                 | Acceleration      | NU    | Difference from Original Sequence ( $P < .05$ ) <sup>a</sup> |
| Sag T1WI                                                 | Original sequence | 6.52  |                                                              |
|                                                          | 2 Averages        | 7.98  | .914                                                         |
|                                                          | 1 Average         | 13.26 | .017 <sup>a</sup>                                            |
|                                                          | Acc 2             | 13.85 | .009 <sup>a</sup>                                            |
|                                                          | Acc 3             | 17.40 | .001 <sup>a</sup>                                            |
| Sag T2WI                                                 | Original sequence | 11.61 |                                                              |
|                                                          | 1 Average         | 14.41 | .014 <sup>a</sup>                                            |
|                                                          | Acc 2             | 13.31 | .181                                                         |
|                                                          | Acc 3             | 16.20 | .001 <sup>a</sup>                                            |
| Sag T2TIRM                                               | Original sequence | 11.59 |                                                              |
|                                                          | Acc 2             | 13.05 | .072                                                         |
|                                                          | Acc 3             | 14.17 | .002 <sup>a</sup>                                            |
| Ax T2* GRE                                               | Original sequence | 8.30  |                                                              |
|                                                          | Acc 2             | 8.58  | .716                                                         |
|                                                          | Acc 3             | 9.30  | .044 <sup>a</sup>                                            |

Note:—Acc indicates acceleration factor; Ax, axial; Sag, sagittal.

<sup>a</sup>Significant.

| On-Line Table 3: Percentage of problematic ratings (quantitative volunteers) |              |                   |      |              |
|------------------------------------------------------------------------------|--------------|-------------------|------|--------------|
| Sequence                                                                     | Acceleration | Frequency (total) | %    | Excluded (x) |
| Sag T1WI                                                                     | 2 Averages   | 2                 | 0.9  |              |
|                                                                              | 1 Average    | 1                 | 0.5  |              |
|                                                                              | Acc 2        | 3                 | 1.4  |              |
|                                                                              | Acc 2        | 2                 | 0.9  |              |
|                                                                              | Acc 3        | 39                | 18.1 | x            |
| Sag T2WI                                                                     | 1 average    | 1                 | 0.5  |              |
|                                                                              | Acc 2        | 7                 | 3.2  |              |
|                                                                              | Acc 2        | 5                 | 2.3  |              |
|                                                                              | Acc 3        | 14                | 6.5  |              |
|                                                                              | Acc 3        | 8                 | 3.7  |              |
| Sag T2TIRM                                                                   | Acc 2        | 22                | 10.2 |              |
|                                                                              | Acc 3        | 33                | 15.3 | x            |
|                                                                              | Acc 3        | 0                 | 0.0  |              |
| Ax T2* GRE                                                                   | Acc 2        | 0                 | 0.0  |              |
|                                                                              | Acc 3        | 0                 | 0.0  |              |
|                                                                              | Acc 3        | 1                 | 0.5  |              |

Note:—Acc indicates acceleration factor; Ax, axial; Sag, sagittal.

| On-Line Table 4: Pathologies missed in the accelerated sequences compared with the original sequence (quantitative patients) |              |                            |      |              |
|------------------------------------------------------------------------------------------------------------------------------|--------------|----------------------------|------|--------------|
| Sequence                                                                                                                     | Acceleration | Pathologies: Missed; Total | %    | Excluded (x) |
| Sag T1WI                                                                                                                     | 2 Averages   | 14                         | 4.9  |              |
|                                                                                                                              | 1 Average    | 22                         | 7.8  |              |
|                                                                                                                              | Acc 2        | 18                         | 6.4  |              |
|                                                                                                                              | Acc 3        | 65                         | 23.0 | x            |
| Sag T2WI                                                                                                                     | 1 Average    | 27                         | 6.1  |              |
|                                                                                                                              | Acc 2        | 4                          | 1.2  |              |
|                                                                                                                              | Acc 3        | 14                         | 4.2  |              |
| Sag T2TIRM                                                                                                                   | Acc 2        | 20                         | 6.8  |              |
|                                                                                                                              | Acc 3        | 24                         | 8.1  |              |
| Ax T2* GRE                                                                                                                   | Acc 2        | 19                         | 10.2 |              |
|                                                                                                                              | Acc 3        | 33                         | 17.7 | x            |

Note:—Acc indicates acceleration factor; Ax, axial; Sag, sagittal.

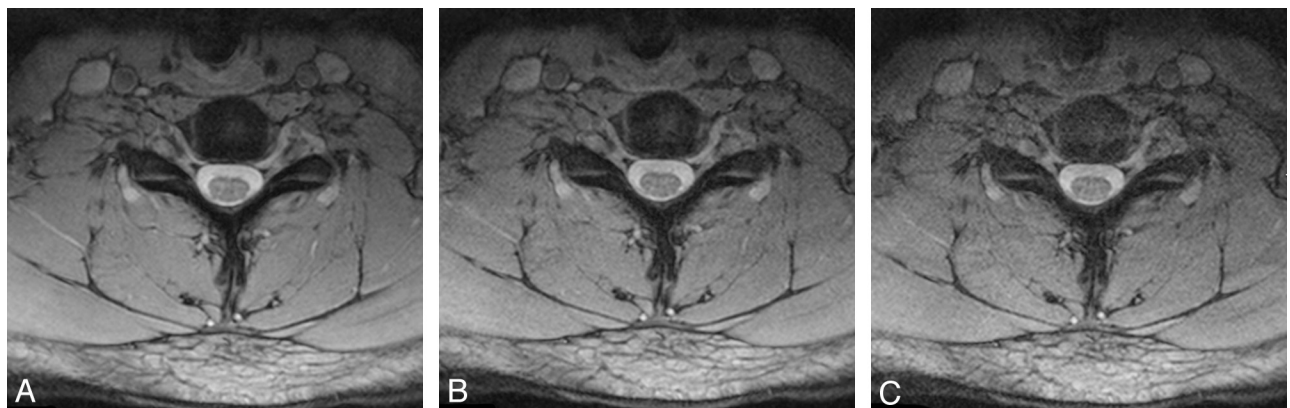

On-Line Fig 1. Axial T2\* GRE sequences (30-year-old male volunteer). A, T2\* GRE, original sequence. B, Acceleration factor 2. C, Acceleration factor 3.
